# Supplementary figures and images for: Comprehensive Analysis of Prognostic Value and Immune Infiltration of IGFBP Family Members in Glioblastoma
Source: Hindawi journal article supplement (doi:10.1155/2022/2929695), 2022-07-04

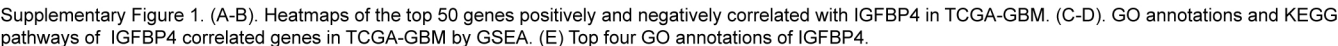

Supplement: f1 [file 2929695.f1.zip]
